# Supplementary material
Source: bioRxiv or medRxiv preprint supplement (http://medrxiv.stage.highwire.org/highwire/filestream/84958/field_highwire_adjunct_files/0/2020.06.03.20118570-1.pdf)
Supplement: Supplementary file [file 2020.06.03.20118570-1.pdf]

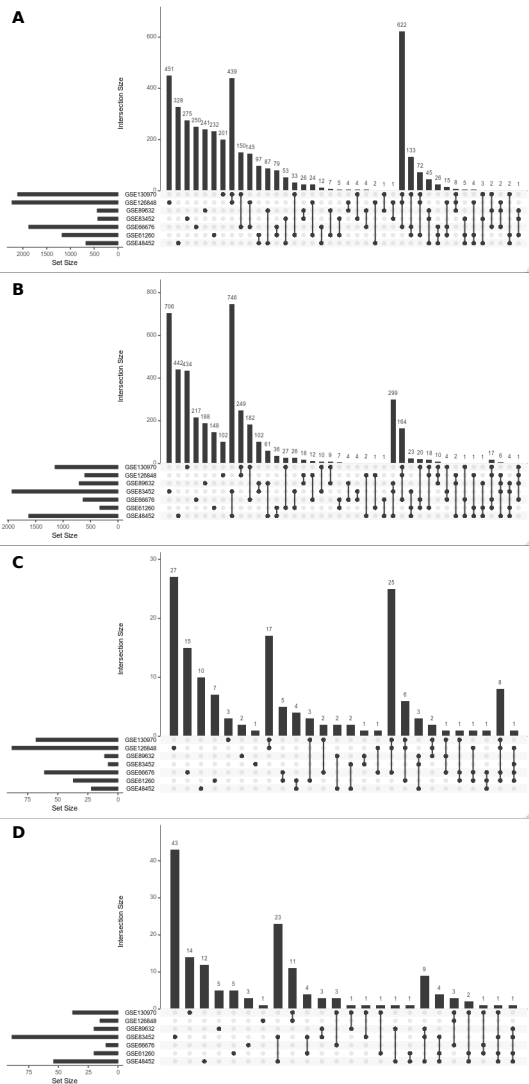

**Supplementary Figure 1. UpSet plots of our gene functional analysis for each individual study for GO terms overexpressed in premenopausal women (A) or in men (B) and KEGG pathways upregulated in premenopausal women (C) or in men (D). Horizontal bars show the total number of significant elements in each study. The vertical bars below show the number of elements shared by the studies with a black dot joined by a line. For bars associated with only one point (i.e., not shared with any other study), the number of specific elements in that study is shown.**
